# Supplementary material
Source: PubMed Central journal article supplement (PMC2710478)
Supplement: 11606_2009_1039_MOESM1_ESM.pdf [file 11606_2009_1039_MOESM1_ESM.pdf]

# Internal Medicine In-Training Examination® 2007 Residents Questionnaire

The Examination Committee would like your help to improve future examinations and training programs. Please complete this voluntary questionnaire after you complete the examination. Although your responses will be stored with your identification number and score, **your answers will be kept confidential** and your individual identity will not be used.

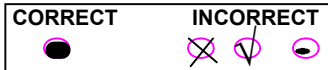

Please use black or blue pen

## Start Here

**1** In the boxes below, please write your identification number (on your examination green card). Under each box fill in the oval that corresponds to the digit in the box.

|   |   |   |   |   |   |   |
|---|---|---|---|---|---|---|
| 6 | 0 |   |   |   |   |   |
| 0 | 0 | 0 | 0 | 0 | 0 | 0 |
| 1 | 1 | 1 | 1 | 1 | 1 | 1 |
| 2 | 2 | 2 | 2 | 2 | 2 | 2 |
| 3 | 3 | 3 | 3 | 3 | 3 | 3 |
| 4 | 4 | 4 | 4 | 4 | 4 | 4 |
| 5 | 5 | 5 | 5 | 5 | 5 | 5 |
| 6 | 6 | 6 | 6 | 6 | 6 | 6 |
| 7 | 7 | 7 | 7 | 7 | 7 | 7 |
| 8 | 8 | 8 | 8 | 8 | 8 | 8 |
| 9 | 9 | 9 | 9 | 9 | 9 | 9 |

**2** What is your PGY level?

- PGY1
- PGY2
- PGY3
- PGY4
- Other

**3** Please rate the amount of time allotted for completing the examination.

|                   |                       |            |                    |                |
|-------------------|-----------------------|------------|--------------------|----------------|
| Very Insufficient | Somewhat Insufficient | Just Right | Somewhat Excessive | Very Excessive |
| ▼                 | ▼                     | ▼          | ▼                  | ▼              |
| -2                | -1                    | 0          | +1                 | +2             |

**4** How difficult was the examination for you?

|                     |                         |            |                       |                   |
|---------------------|-------------------------|------------|-----------------------|-------------------|
| Much Too Elementary | Somewhat Too Elementary | Just Right | Somewhat Too Advanced | Much Too Advanced |
| ▼                   | ▼                       | ▼          | ▼                     | ▼                 |
| -2                  | -1                      | 0          | +1                    | +2                |

**5** How many hours have you had completely free of clinical duty prior to taking this examination?

- 0-7
- 8-15
- 16-23
- 24 or more

**6** What is your ultimate career plan?

Choose one

- |                                                 |                                                 |
|-------------------------------------------------|-------------------------------------------------|
| <input type="radio"/> General Internal Medicine | <input type="radio"/> Med/Peds                  |
| <input type="radio"/> Cardiology                | <input type="radio"/> Nephrology                |
| <input type="radio"/> Endocrinology             | <input type="radio"/> Pulmonology/Critical Care |
| <input type="radio"/> Gastroenterology          | <input type="radio"/> Rheumatology              |
| <input type="radio"/> Geriatrics                | <input type="radio"/> Other subspecialty        |
| <input type="radio"/> Hematology/Oncology       | <input type="radio"/> Other (not IM)            |
| <input type="radio"/> Hospitalist               | <input type="radio"/> Undecided subspecialty    |
| <input type="radio"/> Infectious Diseases       | <input type="radio"/> Undecided career plan     |

**7** How important was each of the following in your career decision (indicated in Question 6)?

|                                                        |                       |                           |                       |                            |                       |
|--------------------------------------------------------|-----------------------|---------------------------|-----------------------|----------------------------|-----------------------|
|                                                        | Very Low Importance   | Moderately Low Importance | Medium Importance     | Moderately High Importance | Very High Importance  |
|                                                        | ▼                     | ▼                         | ▼                     | ▼                          | ▼                     |
| Broad area of practice                                 | <input type="radio"/> | <input type="radio"/>     | <input type="radio"/> | <input type="radio"/>      | <input type="radio"/> |
| Desire to provide a needed service                     | <input type="radio"/> | <input type="radio"/>     | <input type="radio"/> | <input type="radio"/>      | <input type="radio"/> |
| Financial considerations                               | <input type="radio"/> | <input type="radio"/>     | <input type="radio"/> | <input type="radio"/>      | <input type="radio"/> |
| Job opportunities after training                       | <input type="radio"/> | <input type="radio"/>     | <input type="radio"/> | <input type="radio"/>      | <input type="radio"/> |
| Long-term relationships with patients                  | <input type="radio"/> | <input type="radio"/>     | <input type="radio"/> | <input type="radio"/>      | <input type="radio"/> |
| Principal specialty/subspecialty of influential mentor | <input type="radio"/> | <input type="radio"/>     | <input type="radio"/> | <input type="radio"/>      | <input type="radio"/> |
| Time available for non-work activities                 | <input type="radio"/> | <input type="radio"/>     | <input type="radio"/> | <input type="radio"/>      | <input type="radio"/> |
| Time with family                                       | <input type="radio"/> | <input type="radio"/>     | <input type="radio"/> | <input type="radio"/>      | <input type="radio"/> |
| Type/number of clinical procedures                     | <input type="radio"/> | <input type="radio"/>     | <input type="radio"/> | <input type="radio"/>      | <input type="radio"/> |

**8** Do you think your career will include any of the following after you complete your residency/fellowship training?

|                                           |                       |                       |                       |
|-------------------------------------------|-----------------------|-----------------------|-----------------------|
|                                           | Yes                   | No                    | Uncertain             |
|                                           | ▼                     | ▼                     | ▼                     |
| Teaching at Academic Medical Center (AMC) | <input type="radio"/> | <input type="radio"/> | <input type="radio"/> |
| Basic research at AMC                     | <input type="radio"/> | <input type="radio"/> | <input type="radio"/> |
| Clinical research at AMC                  | <input type="radio"/> | <input type="radio"/> | <input type="radio"/> |
| Community-based teaching                  | <input type="radio"/> | <input type="radio"/> | <input type="radio"/> |
| Industry/Pharmaceutical company           | <input type="radio"/> | <input type="radio"/> | <input type="radio"/> |

LHL

Please continue on the other side.

9 In the past 30 days, approximately how many hours did you devote to each of the following?

|                                        | 0                     | 1-24                  | 25-72                 | >72                   |
|----------------------------------------|-----------------------|-----------------------|-----------------------|-----------------------|
| Moonlighting at your training location | <input type="radio"/> | <input type="radio"/> | <input type="radio"/> | <input type="radio"/> |
| Moonlighting at an outside facility    | <input type="radio"/> | <input type="radio"/> | <input type="radio"/> | <input type="radio"/> |

10 What is the approximate amount of your current educational debt?

|                                           |                                             |
|-------------------------------------------|---------------------------------------------|
| <input type="radio"/> None                | <input type="radio"/> \$100,000 - \$149,999 |
| <input type="radio"/> \$1 - \$49,999      | <input type="radio"/> \$150,000 - \$200,000 |
| <input type="radio"/> \$50,000 - \$99,999 | <input type="radio"/> More than \$200,000   |

11 Approximately what percentage of your training do you think should be spent in the outpatient (ambulatory) environment, including both general internal medicine and subspecialty ambulatory experiences?

|                                     |                                 |
|-------------------------------------|---------------------------------|
| <input type="radio"/> Less than 25% | <input type="radio"/> 50% - 66% |
| <input type="radio"/> 25% - 32%     | <input type="radio"/> 67% - 75% |
| <input type="radio"/> 33% - 49%     | <input type="radio"/> Over 75%  |

12 When you are on an inpatient rotation, has the presence of a weekly half-day longitudinal outpatient experience been problematic with regard to any of the following?

|                                                                                        | No                    | Yes, a little         | Yes, a lot            | NA                    |
|----------------------------------------------------------------------------------------|-----------------------|-----------------------|-----------------------|-----------------------|
| Competing inpatient and outpatient responsibilities                                    | <input type="radio"/> | <input type="radio"/> | <input type="radio"/> | <input type="radio"/> |
| Duty-hour regulations                                                                  | <input type="radio"/> | <input type="radio"/> | <input type="radio"/> | <input type="radio"/> |
| Fragmentation of inpatient care                                                        | <input type="radio"/> | <input type="radio"/> | <input type="radio"/> | <input type="radio"/> |
| Inpatient "hand-offs"                                                                  | <input type="radio"/> | <input type="radio"/> | <input type="radio"/> | <input type="radio"/> |
| Interruption/delays in providing outpatient care because of inpatient responsibilities | <input type="radio"/> | <input type="radio"/> | <input type="radio"/> | <input type="radio"/> |
| Travel time between clinic and inpatient units                                         | <input type="radio"/> | <input type="radio"/> | <input type="radio"/> | <input type="radio"/> |

13 How important are each of the following in providing a good outpatient experience for internal medicine residents?

|                                                                                 | Very Unimportant      | Somewhat Unimportant  | Neutral               | Somewhat Important    | Very Important        |
|---------------------------------------------------------------------------------|-----------------------|-----------------------|-----------------------|-----------------------|-----------------------|
| Continuity clinic experience is considered high priority                        | <input type="radio"/> |
| Cross-coverage of outpatients while on inpatient service                        | <input type="radio"/> |
| Experience in a variety of outpatient settings (e.g., clinic, private practice) | <input type="radio"/> |
| Increased subspecialty clinics                                                  | <input type="radio"/> |
| No conflict with inpatient responsibilities                                     | <input type="radio"/> |
| Time with outpatients                                                           | <input type="radio"/> |

14 Which one of the following would be the best way to obtain ambulatory training, including experience in the longitudinal care of general medical patients?

Choose one

- Weekly half-day ambulatory sessions
- Frequent block rotations (both general medicine and ambulatory subspecialties) interspersed between inpatient rotations; no ambulatory sessions while on inpatient service
- A prolonged (3 to 4 months), continuous ambulatory experience (both general medicine and ambulatory subspecialties); no ambulatory sessions while on inpatient service
- Weekly half-day ambulatory sessions plus occasional block rotations (2 to 3 months total scattered over a year)
- A combination of weekly half-day ambulatory sessions while on inpatient services interspersed with an occasional prolonged (3 to 4 months), continuous ambulatory experience with no inpatient responsibilities

15 Indicate whether or not your IM-ITE score or the score of someone you know has been used for each of the following.

|                                                                 | No                    | Yes, my score         | Yes, someone else's score |
|-----------------------------------------------------------------|-----------------------|-----------------------|---------------------------|
| Promotion to next PGY level                                     | <input type="radio"/> | <input type="radio"/> | <input type="radio"/>     |
| Scores provided to fellowship programs by residency program     | <input type="radio"/> | <input type="radio"/> | <input type="radio"/>     |
| Scores provided to fellowship programs by applicant             | <input type="radio"/> | <input type="radio"/> | <input type="radio"/>     |
| Fellowship program requesting scores with application materials | <input type="radio"/> | <input type="radio"/> | <input type="radio"/>     |
| Fellowship program requesting scores during interview           | <input type="radio"/> | <input type="radio"/> | <input type="radio"/>     |

16 Which of the resources below have you purchased or do you plan to purchase to prepare for the ABIM certification examination?

Choose all that apply

- MKSAP
- Board Basics: An Enhancement to MKSAP
- ACP Medicine
- MedStudy Core Curriculum
- MedStudy Board Style Questions & Answers
- UpToDate
- Registration for an ACP board review course
- Registration for a medical school or hospital-sponsored board review course

FFF

Thank You

Page 2
